# Supplementary material
Source: HighWire-hosted journal article supplement (https://bmjopen.bmj.com/content/10/5/e033101)
Supplement: inline-supplementary-material-1 [file inline-supplementary-material-1.pdf]

**Online Supplementary Materials**

Appendix I: search strategy for Medline (OVID)

Appendix II: data extraction chart

**Appendix I: search strategy for Medline (OVID)**

1. exp Pregnancy/
2. Pregnant Women/
3. exp Diabetes, Gestational/
4. (pregnan\* or gestational\* or maternal\* or maternity).ti,ab,kw.
5. 1 or 2 or 3 or 4
6. breast milk expression/
7. ((antenatal\* or before birth\* or prenatal) adj5 (breastmilk\* or breast milk\* or colostrum or (milk adj2 express\*))).ti,ab,kw.
8. 6 or 7
9. 5 and 8

Results: 140 references retrieved

**Appendix II: data extraction chart**

| <b>Bibliometric Details</b>                        |  |
|----------------------------------------------------|--|
| Study Title                                        |  |
| Study Authors                                      |  |
| Year of Publication                                |  |
| Study Journal                                      |  |
| Study citation details (volume, issue, pages, doi) |  |
| <b>Study Design</b>                                |  |
| Type of study                                      |  |
| Country where the study was conducted              |  |
| Objective(s)                                       |  |
| Setting                                            |  |
| Study Population(s)                                |  |
| Study Period                                       |  |
| Outcome measure(s)                                 |  |
| <b>Methods</b>                                     |  |
| Data collection method(s)                          |  |
| Intervention                                       |  |
| Timing of intervention                             |  |
| Method of antenatal BME applied                    |  |
| Instructed frequency of antenatal BME              |  |
| Collection and/or storage of colostrum/breastmilk? |  |
| Comparator                                         |  |
| Main findings                                      |  |
